# Supplementary material
Source: PubMed Central journal article supplement (PMC10651618)
Supplement: 11357_2023_771_MOESM1_ESM.pdf [file 11357_2023_771_MOESM1_ESM.pdf]

## Supplementary Figures

### **A Genome-Wide Association Study of Frailty Identifies Significant Genetic Correlation with Neuropsychiatric, Cardiovascular and Inflammation Pathways**

Yixuan Ye (1) \*, Rommell B. Noche (2) \*, Natalia Szejko (2,3,4),

Cameron P. Both (2), Julian N. Acosta (2), Audrey C. Leasure (2), Stacy C. Brown (5),

Kevin N. Sheth (2), Thomas M. Gill (6), Hongyu Zhao+ (1,7), Guido J. Falcone+ (2)

\*Contributed equally

+Jointly supervised this work

## Supp. Figure 1. Workflow

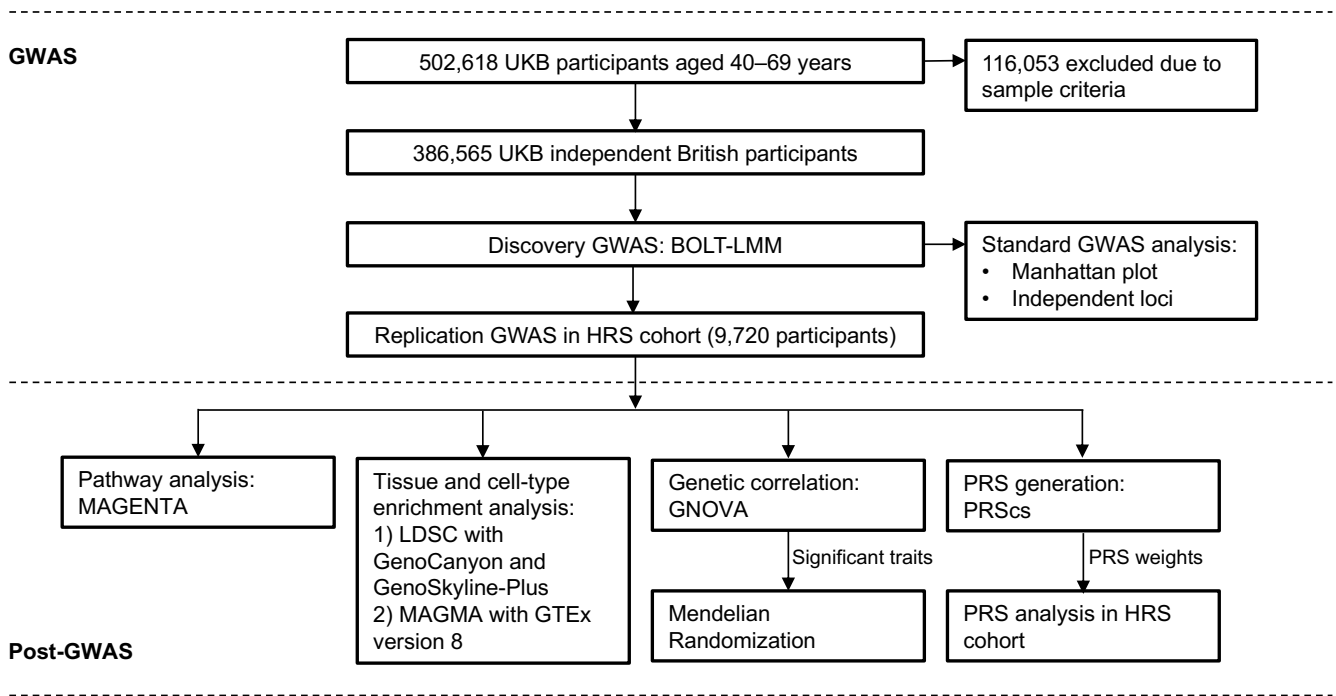

Supp. Figure 2. Selection of number of principal components in GWAS analysis

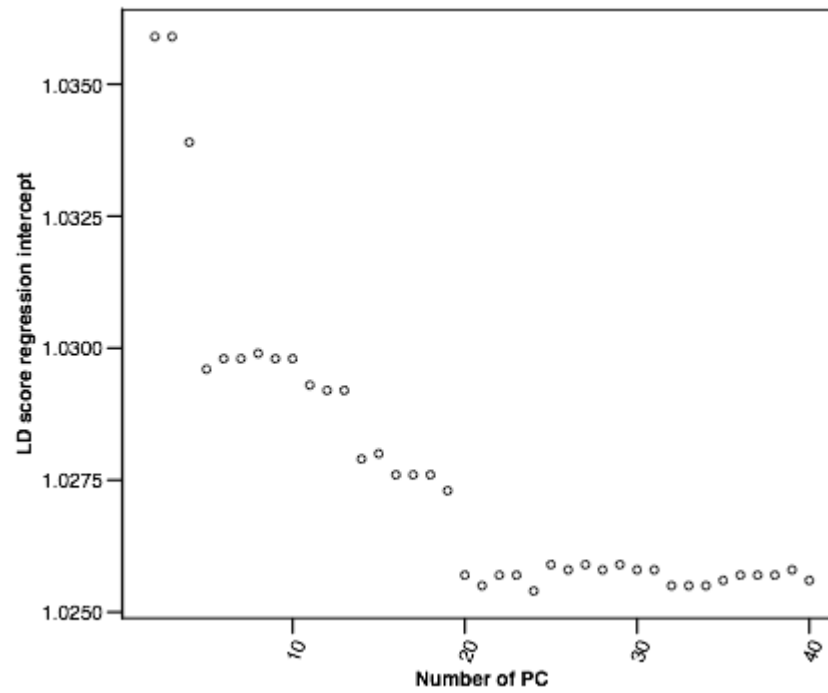

### Supp. Figure 3. LocusZoom plot of novel genetic variants

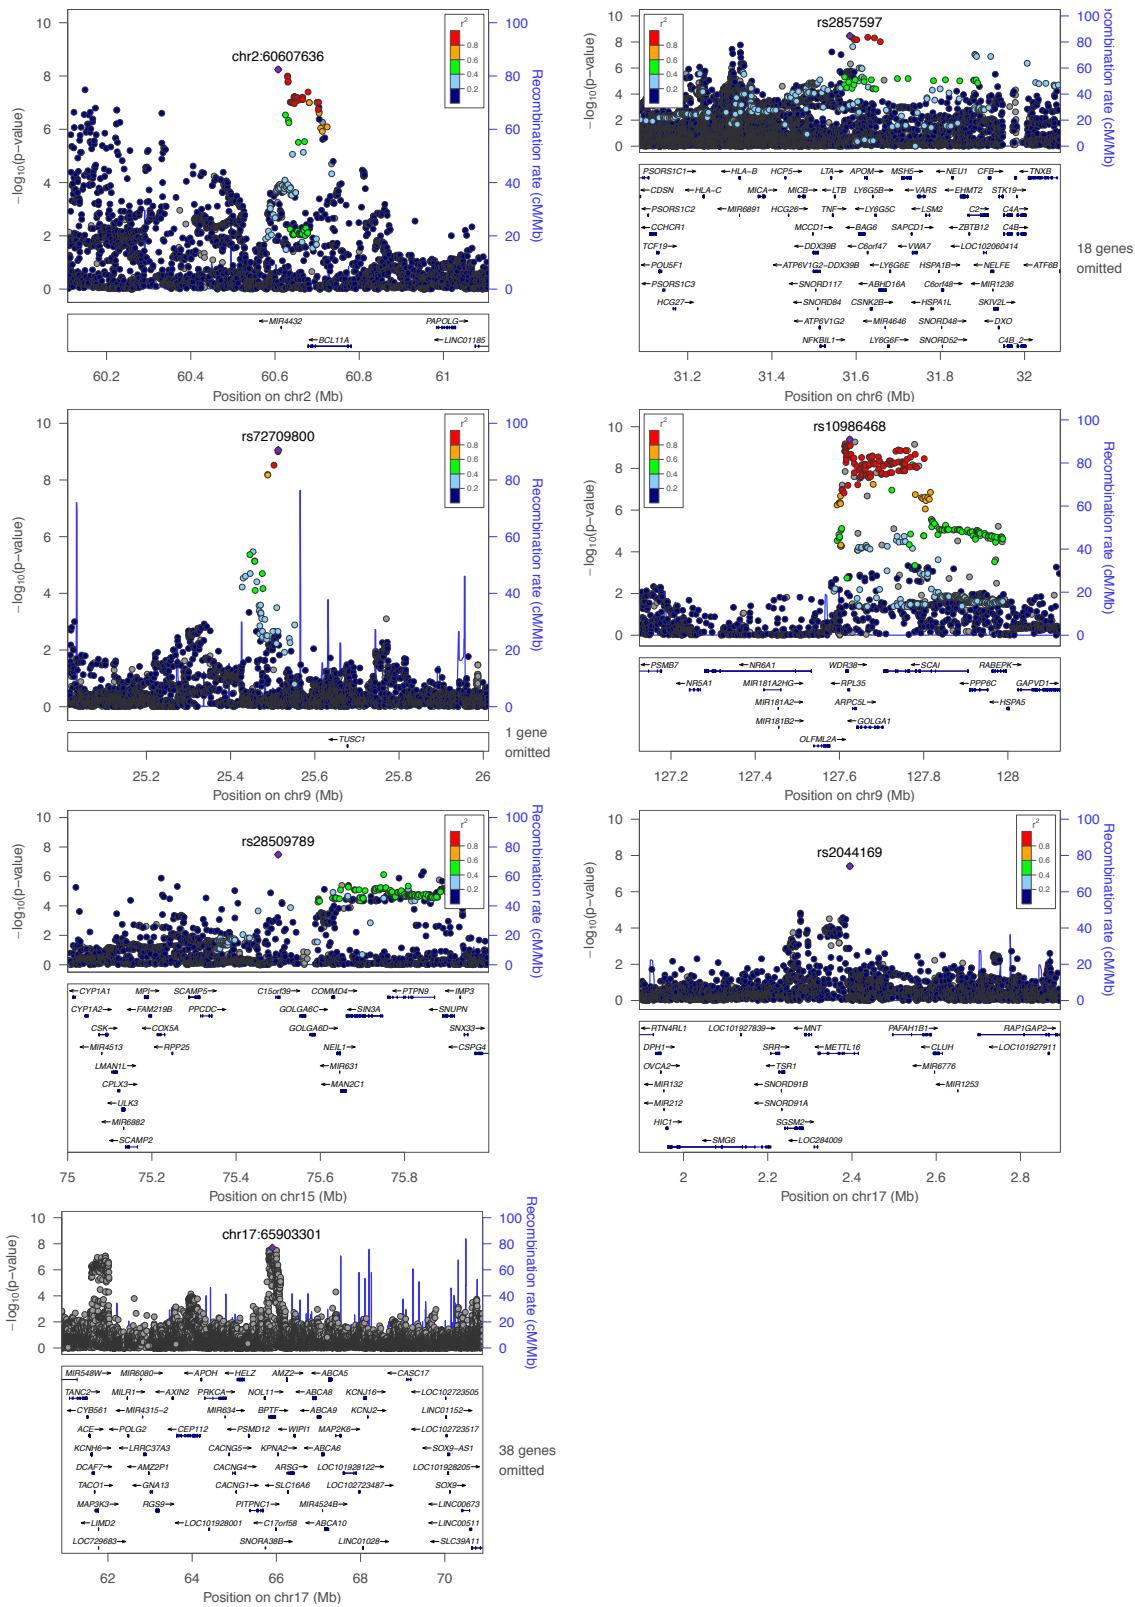

Supp. Figure 4. MAGMA tissue enrichment results

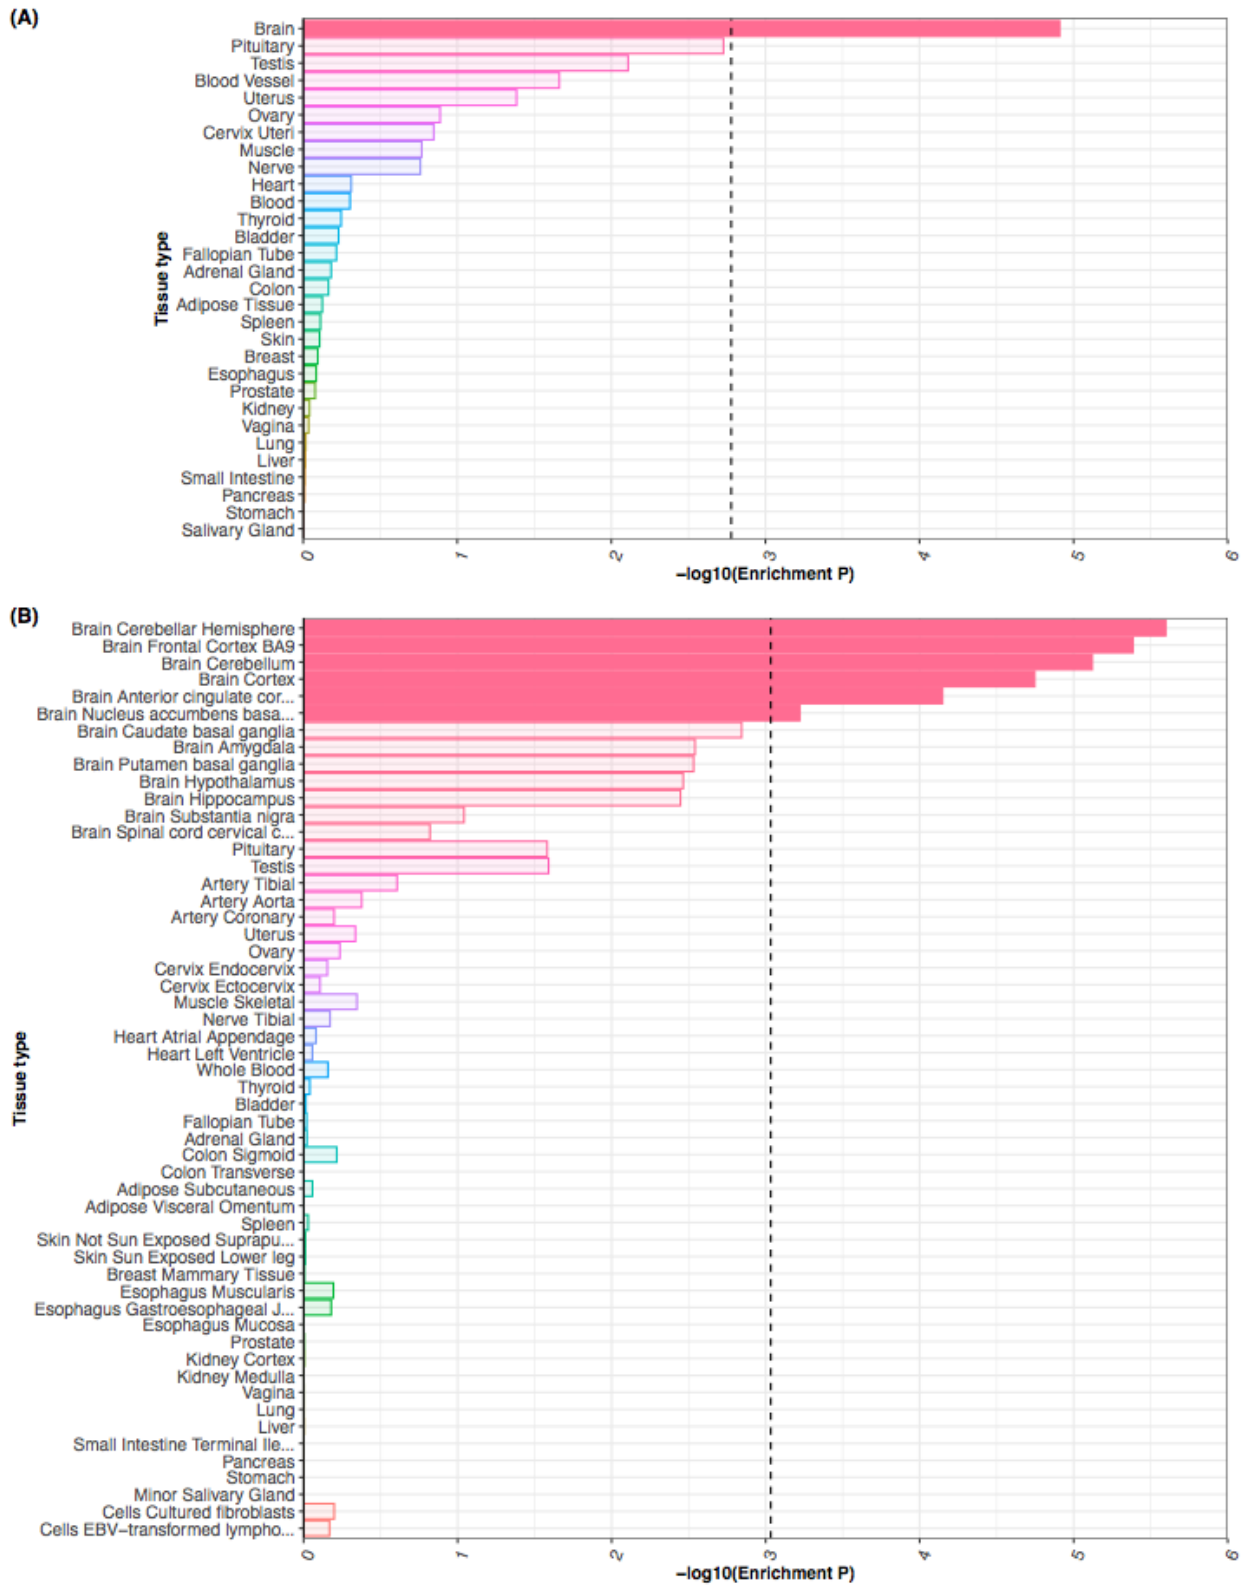

(A) MAGMA tissue enrichment results based on 30 general tissues from GTEx v8 or (B) MAGMA tissue enrichment results based on 54 specific tissues from GTEx v8. The vertical dotted line indicates the Bonferroni-adjusted P-value for significant enrichment.
